# Supplementary material for: Nitrified coke wastewater sludge flocs: an attractive precursor for N,S dual-doped graphene-like carbon with ultrahigh capacitance and oxygen reduction performance
Source: Royal Society of Chemistry journal article supplement (doi:10.1039/c6ta09887h), 2016-12-08
Supplement: c6ta09887h1.pdf [file c6ta09887h1.pdf]

## Supplementary Information

### Nitrified coke wastewater sludge flocs: attractive precursor for N, S dual-doped graphene-like carbon with ultrahigh capacitance and oxygen reduction performance

Zhenchao Lei,<sup>‡a</sup> Weiming Feng,<sup>‡a</sup> Chunhua Feng,<sup>\*ab</sup> Weijia Zhou,<sup>a</sup> Chaochai Wei<sup>a</sup> and Xin Wang<sup>\*b</sup>

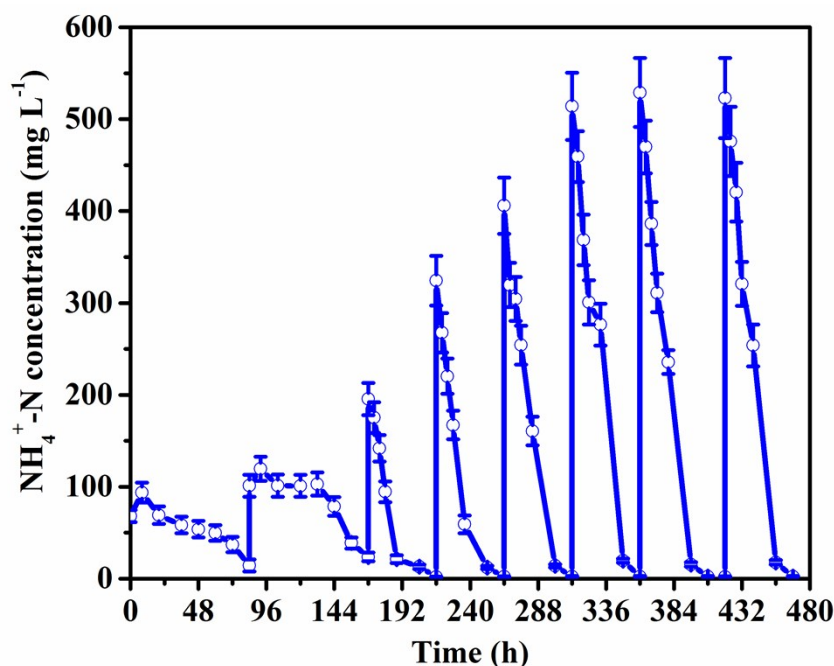

**Fig. S1** The time courses of  $\text{NH}_4^+\text{-N}$  concentrations for the coke wastewater sludge acclimated with successive amendments of  $\text{NH}_4\text{Cl}$  in increasing concentrations (ie., 50, 100, 200, 300, 400 and 500  $\text{mg L}^{-1}$   $\text{NH}_4^+\text{-N}$ ).

*a* The Key Lab of Pollution Control and Ecosystem Restoration in Industry Clusters, Ministry of Education, School of Environment and Energy, South China University of Technology, Guangzhou 510006, PR China. \*E-mail: chfeng@scut.edu.cn

*b* School of Chemical and Biomedical Engineering, Nanyang Technological University, 62 Nanyang Drive, Singapore, 637459. \*E-mail: wangxin@ntu.edu.sg

<sup>†</sup> Electronic supplementary information (ESI) available.

<sup>‡</sup> Z. C. Lei and W. M. Feng contributed equally to this work.

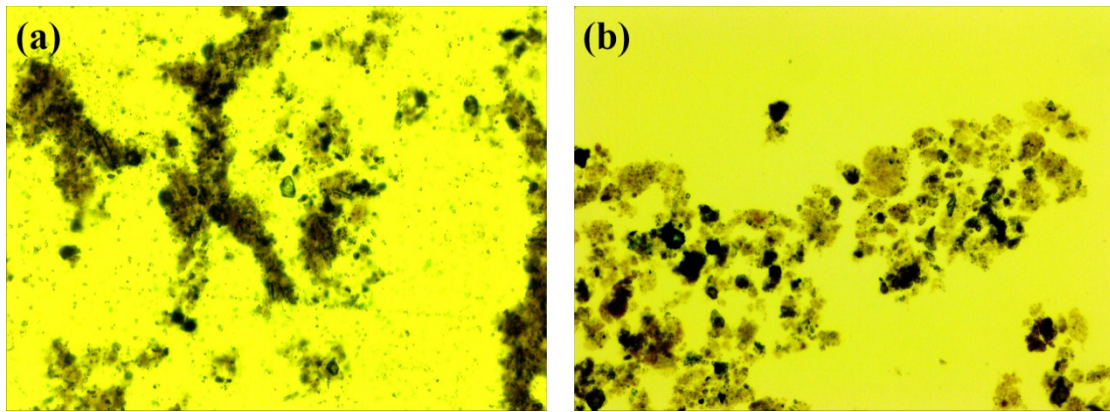

**Fig. S2** The phase contrast microscopy images of (a) the initial coking wastewater sludge flocs and (b) the coking wastewater sludge flocs after acclimation with ammonium.

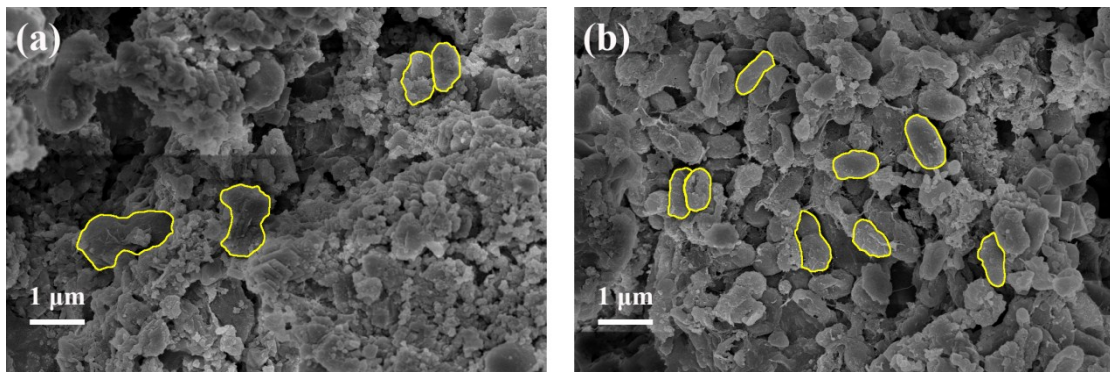

**Fig. S3** The SEM images of (a) the initial coking wastewater sludge flocs and (b) the coking wastewater sludge flocs after acclimation with ammonium.

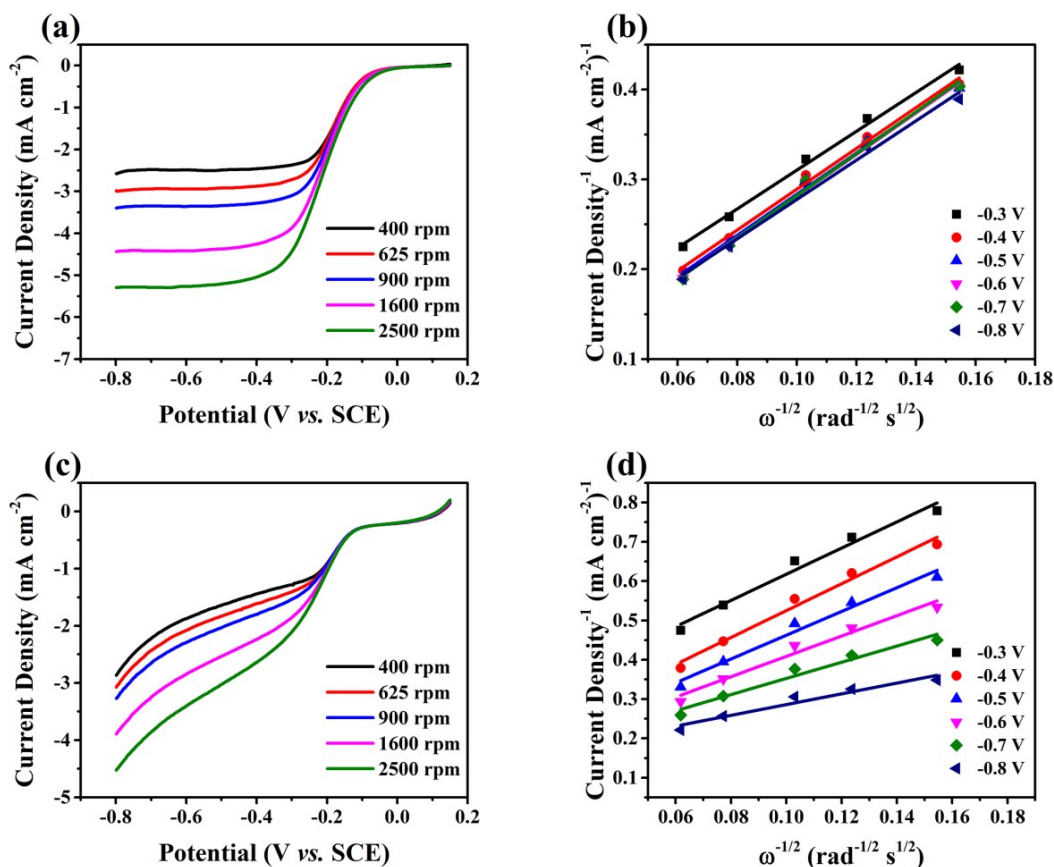

**Fig. S4** RDE voltammograms recorded for the Pt/C (a) and SFC (c) electrodes at different rotation rates; (d) Koutecky - Levich plots of  $J^{-1}$  against  $\omega^{-1/2}$  for the Pt/C (b) and SFC (d) electrodes at different potentials.

**Table S1** The relative elemental composition (in unit of atomic percent) determined by EDS and XPS.

| Sample | Measurement method | C (at%) | N (at%) | O (at%) | S (at%) | P (at%) | Fe (at%) | Si (at%) | Ca (at%) |
|--------|--------------------|---------|---------|---------|---------|---------|----------|----------|----------|
| SF     | EDS                | 50.45   | 8.01    | 32.22   | 2.29    | 2.08    | 1.13     | 1.25     | 2.57     |
| NSF    | EDS                | 44.64   | 10.25   | 34.86   | 4.51    | 1.25    | 1.94     | 0.64     | 1.91     |
| SFC    | EDS                | 79.07   | 2.54    | 14.73   | 1.46    | n.d.    | n.d.     | 1.38     | 0.82     |
|        | XPS                | 79.52   | 3.09    | 14.02   | 1.71    | n.d.    | n.d.     | 1.02     | 0.64     |
| NSFC   | EDS                | 78.73   | 7.60    | 12.27   | 2.40    | n.d.    | n.d.     | n.d.     | n.d.     |
|        | XPS                | 79.03   | 7.43    | 10.12   | 3.42    | n.d.    | n.d.     | n.d.     | n.d.     |

SF: the initial (coking wastewater) sludge flocs; NSF: the nitrifying (coking wastewater) sludge flocs; SFC: carbon derived from SF; NSFC: carbon derived from NSF; n.d.: not detected.
